# Supplementary material for: The Differentiation in vitro of Human Tonsil B Cells With the Phenotypic and Functional Characteristics of T-bet+ Atypical Memory B Cells in Malaria
Source: Front Immunol. 2019 Apr 24;10:852. doi: 10.3389/fimmu.2019.00852 (PMC6491666; doi:10.3389/fimmu.2019.00852)
Supplement: Supplementary file 4 [file Table_4.XLSX]

## Sheet: Rank order of expression
Table S4: Differential expression of various cell surface proteins in naïve and memory B cells after in vitro stimulation.
Naïve B cells
Rank	Cell surface protein	log base2(Fold change(gMFI:stimulated/gMFI:unstimulated))			Transcript levels
		Individual 1	Individual 2	Individual 3	log base2(atypical vs classical)
1	CD71	4.65644	4.56661	4.74912	-1.04
2	CD108	4.36247	3.9957	4.12033	1.97
3	CD54	3.68367	3.87405	3.35097	-1.49
4	CD69	4.09871	3.31266	3.14668	-2.48
5	CD58	3.03283	3.40953	3.59697	1.22
6	CD25	3.61196	3.19742	2.64339	-2.67
7	CD319	2.73943	3.02008	2.70099	3.03
8	CD83	2.66396	2.90803	2.88003	-1.38
9	CD63	2.36814	2.77449	2.83206	1.39
10	CD298	2.14343	2.75283	2.80565	1.84
11	CD274	2.87386	2.373	2.41431	1.5
12	CD166	2.12856	2.72595	2.78992	1.42
13	CD80	2.227	2.55892	2.48954	1.08
14	CD82	2.09296	2.23109	2.63136	-1.25
15	CD97	2.29765	2.23425	2.20199	2.46
16	CD86	2.02353	2.38596	2.19086	1.83
17	CD48	1.8079	2.31789	2.17287	1.03
18	CD44	1.90665	1.78879	2.45505	-2.05
19	CD49a	1.78406	2.36425	1.63414	-1.03
20	CD100	1.71878	2.10824	1.90636	-1.14
21	CD29	1.5688	2.14577	1.99823	-1.18
22	CD95	2.00648	2.30655	1.38748	2.4
23	4-1BB Ligand	1.66733	2.13879	1.82957	-1.1
24	CD36	1.73229	2.28454	1.58273	1.04
25	CD150	1.91891	1.89245	1.66997	1.39
26	CD132	1.58449	2.18486	1.70756	-1.09
27	CD43	1.62503	1.97246	1.85376	-1.23
28	CD84	1.78868	2.0011	1.64032	2.48
29	CD226	1.42282	2.30412	1.57671	-1.66
30	CD11a	1.51216	2.10267	1.63743	1.47
31	CD279	1.52505	1.89641	1.82976	1.08
32	CD107a	1.43826	1.951	1.86036	1.08
33	CD39	1.37053	2.13316	1.57007	-1.05
34	HLA-E	1.29741	2.22506	1.53951	1.08
35	LAP	1.88634	1.83869	1.2251	1.02
36	CD200	1.23561	1.9523	1.65934	-2.65
37	CD40	1.72513	1.78545	1.33192	-2.11
38	HLA-A B C	1.4156	1.43954	1.96967	1.02
39	CD252	1.44667	1.80547	1.55161	-1.08
40	CD267	1.42835	1.87985	1.49345	1.18
41	CD210	1.60142	1.76946	1.41134	1.75
42	CD179a	1.24928	2.00351	1.47954	-1.01
43	CD18	1.31035	1.87964	1.53673	1.8
44	CD74	1.70709	1.74484	1.26824	1.09
45	CD129	1.38301	1.8265	1.47382	-1.05
46	CD164	1.47691	1.88446	1.24695	1.59
47	CD131	1.71126	1.85262	1.00707	-1.3
48	CD93	1.38023	1.74885	1.41808	-1.02
49	Notch1	1.48839	1.90803	1.0878	1.13
50	CD317	1.33915	1.85898	1.28412	1.14
51	CD85j	1.34418	1.79636	1.32677	1.83
52	CD254	1.18322	1.89637	1.35029	1.04
53	CD70	1.3013	1.71456	1.35867	-1.57
54	CD275	1.34361	1.63019	1.36111	-1.24
55	Jagged 2	1.35521	1.82374	1.12557	1.05
56	CD273	1.3334	1.56833	1.39584	2.1
57	CD262	1.33792	1.69251	1.26075	-1.01
58	CD47	1.11297	2.0239	1.13037	1.23
59	CD231	1.27636	1.53731	1.44846	1
60	CD200R	1.21237	1.63225	1.39713	2.78
61	CD258	1.33606	1.62333	1.26584	1.1
62	CD156c	1.2967	1.71315	1.19967	1.08
63	CD135	1.38303	1.6063	1.21766	-1.03
64	CD124	1.26767	1.64016	1.29751	-4.55
65	CD49f	1.19815	1.75081	1.2522	-1.11
66	CD276	1.20966	1.5016	1.48482	1
67	CD220	1.29741	1.63747	1.1911	1.45
68	CD1c	1.21749	1.59243	1.29581	-1.47
69	CD261	1.17197	1.75634	1.17562	-1.46
70	cd11c	1.19405	1.47081	1.3869	6.91
71	CD49d	1.10544	1.75825	1.16523	-1.03
72	CD59	0.834692	1.67054	1.51265	-1.39
73	CD126	1.08512	1.35124	1.56441	-1.15
74	Notch2	1.27495	1.69201	0.982972	1.13
75	NPC	1.27948	1.67252	0.990542
76	CD22	1.2621	1.6533	1.01493	1.22
77	CD213a2	1.16419	1.70207	1.06257	1.04
78	CD277	1.39143	1.57162	0.93576	1.13
79	CD14	1.19885	1.54045	1.14671	1.04
80	CD85k	1.33708	1.58269	0.949462	1.08
81	CD178	1.19684	1.55878	1.10551	1.04
82	CD30	1.23459	1.61119	1.01127	-1.02
83	CD115	1.13997	1.61438	1.09379	1.02
84	CD138	1.20801	1.59306	0.990978	-1.04
85	CD284	1.152	1.65752	0.94434	-1.56
86	HLA-A2	1.1921	1.49822	1.06014	1.1
87	CD102	1.14938	1.58751	0.993071	-1.61
88	CD172g	1.11981	1.60643	1.00131	1.01
89	CCR10	1.17776	1.55131	0.997868	1.01
90	CD114	1.15268	1.56918	1.0048	-1.11
91	CD195	1.02184	1.54447	1.14819	-1.02
92	CD38	1.04856	1.56838	1.09124	-3.37
93	CD46	1.78164	1.84604	0.052683	1.11
94	CD146	0.81736	2.0082	0.819548	-1.03
95	CD1a	1.2095	1.5385	0.894432	-1.69
96	CD1b	1.16713	1.51264	0.937363	-1.02
97	B2-microglobulin	1.58558	0.756535	1.24749	1.04
98	CD127	1.21158	1.5171	0.85561	-1.29
99	CD19	1.15498	1.53246	0.829399	1.76
100	CD301	1.15747	1.27054	1.07982	-1.02
101	CD11b	1.15349	1.47962	0.871397	-2.37
102	Galectin-9	1.13154	1.4281	0.943619	1.01
103	cd183	0.834117	1.27244	1.38607	-1.13
104	CD51 CD61	1.08483	1.43353	0.966226	1.46
105	CD205	1.30149	1.57049	0.549696
106	CD85d	0.887556	1.47465	1.05497	3.55
107	FcRL4	1.076	1.37292	0.96132	1.12
108	CD64	0.996299	1.66252	0.738911	1.02
109	CD152	0.98212	1.40891	1.0043	-1
110	CD163	1.00552	1.55585	0.82811	-1.06
111	CD119	1.06607	1.21374	1.10928	1.06
112	CD325	0.956244	1.4844	0.854419	1.05
113	CD179b	0.991636	1.2986	0.975474	1.21
114	CD55	1.05076	1.12697	1.0825	-1.7
115	CD257	1.09291	1.37655	0.771671	1.01
116	CD137	0.974274	1.25712	1.00166	1
117	CD1d	0.991413	1.35784	0.878722	-1.2
118	CD148	0.983047	1.49297	0.692858	-1.43
119	HVEM	1.00814	1.48227	0.633652	1.02
120	CD33	0.939319	1.32172	0.847456	-1.01
121	Notch4	1.03748	1.36611	0.69782	1.02
122	CD314	0.949766	1.301	0.83785
123	CD13	0.948499	1.54905	0.586981	-1.01
124	CD215	0.917381	1.35138	0.808948	-1.05
125	CD11b	1.05253	1.54783	0.443974	-2.37
126	CD66a,2f,c,2f,e	0.976986	1.34261	0.699937	-1.6
127	CD117	1.06484	1.3848	0.560951	1.04
128	Lymphotoxin B Receptor	0.926401	1.31726	0.718864	-1.07
129	CD218a	0.83289	1.35751	0.759098	-1.15
130	IL-28RA	1.0241	1.41521	0.486206	2.2
131	CD286	0.986479	1.28503	0.638092	1.05
132	CD282	0.897768	1.36084	0.643162	-1.2
133	CD357	0.976717	1.08503	0.807746	-1.15
134	CD263	0.915415	1.21371	0.730047	1.01
135	CD253	0.882527	1.28049	0.664598	-2.46
136	MAIR-II	0.918674	1.37947	0.49855	1.11
137	CD162	0.910089	1.36949	0.501553	-1.17
138	CD73	0.614651	1.49419	0.654973	-2.59
139	HLA-DQ	0.559645	0.760516	1.36014	1
140	MSC	0.728319	1.09859	0.848333	1.12
141	CD351	0.821733	1.35774	0.488195	1.08
142	CLEC12A	0.633712	1.13971	0.856445	-1.04
143	CD99	0.836772	1.21911	0.571658	-1.06
144	CD290	0.846121	1.24208	0.539059	1.03
145	DR3	0.820994	1.29765	0.45997	-1.01
146	CD355	0.794368	1.2416	0.537593	1.03
147	CD243	0.917538	1.35815	0.282821	-1.46
148	CD229	0.682937	1.22416	0.65139	-1.03
149	Tim-4	0.866332	1.16717	0.518777	-1.01
150	Tim-1	0.767032	1.17156	0.56589	1.04
151	CD209	0.841067	1.33036	0.293451	-1.06
152	CXCR7	0.88104	1.29509	0.266646	1.07
153	CD360	0.921246	1.12691	0.330362	1.13
154	CD23	0.438396	1.30386	0.565712	-4.63
155	CD221	0.67685	1.0171	0.608651	-1.26
156	CD181	0.810812	1.17155	0.307882	-1.03
157	cd307e	0.784123	1.25496	0.244516	4.53
158	IFN-g R b chain	0.59102	1.14723	0.536079	-1.41
159	CD354	0.697686	1.11737	0.457358	1.84
160	CD7	0.681959	1.29173	0.259328	1.05
161	CD85	0.758903	1.13769	0.322116	1.83
162	CD15	0.79005	1.16129	0.202309	-1.12
163	CD10	1.09808	0.691994	0.359093	-1.27
164	CD180	0.739924	1.23133	0.166398	1.15
165	FcRL6	0.562303	1.14044	0.426756	1.01
166	CD167a	0.666608	1.06546	0.397353	-1.25
167	CD26	0.763289	0.901016	0.408046	1.37
168	CD49e	0.797226	1.11595	0.156772	-1.04
169	CD51	0.750799	1.10909	0.170615	1.46
170	Siglec-10	0.617551	1.143	0.117618	1.27
171	Delta Opioid Receptor	0.761919	1.24743	-0.137751	1.05
172	HLA-DR	0.575386	0.73676	0.389457	1.07
173	CD27	0.664335	0.991993	0.0445704	-4.33
174	C3aR	0.516527	0.660658	0.51657	-1.05
175	CD28	0.543867	0.937634	0.191127	1.01
176	CD56	0.518759	1.00119	0.0961458	1.1
177	CD193	0.635428	1.05528	-0.0848891	-1.03
178	CD255	0.534295	1.10586	-0.0406616	1.06
179	HLA-G	0.688149	0.980485	-0.0931848	1.05
180	Siglec-9	0.544491	0.945996	0.00643591	-1
181	Pre-BCR	0.563194	0.931589	-0.0518926	-1.02
182	CD338	0.580882	1.00682	-0.202769	1.01
183	CD81	0.433622	0.681824	0.266561	-1.07
184	EGFR	0.582147	1.05411	-0.266009	1.02
185	CX3CR1	0.0729317	0.962064	0.320991	-1.04
186	CD2	0.424217	0.903215	0.0202625	-1.03
187	CD90	0.60696	0.948601	-0.215992	1.12
188	CD154	0.596103	1.04603	-0.311202	1.17
189	CD45RA	0.375692	0.815321	0.11621	1.16
190	Notch3	0.653154	0.450787	0.184467	1.01
191	CD122	0.480147	0.811681	-0.00440839	2.25
192	CD3	0.342143	0.613686	0.327338	-1.1
193	TSLPR	0.505931	0.907488	-0.139086	1
194	CD45RO	0.437617	0.732007	0.0934507	1.16
195	CD50	0.325356	0.568227	0.348927	-1.12
196	TNAP	0.498805	0.994809	-0.272414	-1.03
197	CD272	0.557144	0.995964	-0.358419	-1.38
198	CLEC9A	0.33409	0.870822	-0.0927524	1.01
199	CD352	0.554312	0.892832	-0.377675	1.4
200	MSC NPC	0.377017	0.576642	0.080524
201	TLT-2	0.595655	0.604578	-0.205216	-1.56
202	CD123	0.740297	-0.0425786	0.241329	-1.76
203	CD328	0.312529	0.679006	-0.137868	1.01
204	CD21	0.348749	0.637483	-0.189894	-8.09
205	CD45RB	0.460927	0.375389	-0.112086	1.16
206	CD45	0.24369	0.161373	0.191263	1.16
207	CD31	0.0950886	0.537527	-0.0757922
208	Integrin B7	0.211504	0.585987	-0.489994	1.55
209	CD103	0.216107	0.494095	-0.408455	1
210	CD6	0.292936	0.620791	-0.635649	-1.08
211	CD34	0.225421	0.672214	-0.619878	1.05
212	FceRIa	-0.00964339	0.685694	-0.44746	-1.47
213	CD5	-0.061928	0.50529	-0.408221	-1.46
214	CD9	-0.388108	0.628189	-0.245164	-1.33
215	CD304	0.12999	0.488986	-0.846566	1.02
216	Mac-2	0.0661126	0.348968	-0.752678	-1.25
217	erbB3	-0.0311189	-0.100798	-0.212237	1.03
218	CD79b	-0.135982	-0.0062387	-0.354868	-1.41
219	IgD	-0.0993152	0.449861	-0.870163	-1.42
220	CD32	-0.169225	-0.0135177	-0.437567	1.39
221	CD197	-0.646426	-0.224745	-0.105003	-4.74
222	CD53	-0.617999	0.0710226	-0.604863	-1.13
223	DLL4	-0.454812	-0.21787	-0.495579	1.04
224	CD196	-0.633455	0.217273	-0.775812	-1.84
225	CD24	-0.247328	-0.366619	-0.699569	-6.44
226	CD35	-0.347924	0.248979	-1.30054	-13.09
227	DLL1	-0.557244	-0.113726	-0.9688	1.21
228	CD268	-0.148612	-0.394894	-1.21839	-1.17
229	Ig light chain l	-0.664789	-0.378097	-0.99094
230	IgM	-0.512938	-0.785154	-1.01232	-1.24
231	CD52	-0.769962	-0.732752	-0.886041	-1.1
232	CD62L	-1.095	-0.311911	-1.01266	-6.95
233	CD20	-1.47785	-0.352864	-0.679802	1.31
234	CD61	-0.723789	-0.227994	-1.6847	1.81
235	Ig light chain k	-0.793212	-0.867344	-1.37604
236	CD184	-2.37256	-1.86954	-2.09291	-1.84
MBCs
Rank	Cell surface protein	log base2(Fold change(gMFI:stimulated/gMFI:unstimulated))			Transcript levels
		Individual 1	Individual 2	Individual 3	log base2(atypical vs classical)
1	CD71	4.26453	3.73165	5.25699	-1.04
2	CD108	3.57192	2.98392	4.51805	1.97
3	CD54	3.68592	3.16167	3.97706	-1.49
4	CD69	3.41986	2.68486	4.29698	-2.48
5	CD58	2.9387	2.93523	3.49926	1.22
6	CD25	2.5891	2.41091	3.37493	-2.67
7	CD319	2.23851	2.15298	3.62757	3.03
8	CD83	2.50351	2.16993	3.16865	-1.38
9	CD63	2.2373	2.52002	2.63865	1.39
10	CD298	2.20451	2.08963	3.07783	1.84
11	CD166	2.39222	2.29216	2.64166	1.42
12	CD274	2.11343	2.14905	2.90662	1.5
13	CD80	2.08185	2.25187	2.65369	1.08
14	CD82	1.89965	2.36897	2.63127	-1.25
15	CD97	2.31404	2.15979	2.27517	2.46
16	cd86	2.59458	1.72293	2.24047	1.83
17	CD48	2.38797	2.1279	2.03642	1.03
18	CD44	1.81904	2.09353	2.59242	-2.05
19	CD49a	1.97804	1.74635	2.66696	-1.03
20	cd95	1.98099	2.07459	2.3152	2.4
21	CD29	1.79337	1.92151	2.56178	-1.18
22	CD132	1.91373	1.93909	2.20436	-1.09
23	4-1BB Ligand	1.89232	1.7891	2.23932	-1.1
24	CD84	1.87046	1.98207	2.0446	2.48
25	CD226	1.69865	1.75457	2.40675	-1.66
26	CD150	1.80356	1.72641	2.31858	1.39
27	CD43	1.64363	1.87438	2.30871	-1.23
28	CD100	1.90943	1.78073	2.13291	-1.14
29	CD36	2.23945	1.13075	2.41901	1.04
30	CD11a	2.08874	1.6799	1.8832	1.47
31	CD107a	1.85143	1.59234	2.11789	1.08
32	CD39	1.88026	1.57994	2.02913	-1.05
33	CD279	1.64416	1.867	1.8534	1.08
34	HLA-E	1.18324	1.91548	2.23886	1.08
35	LAP	1.53577	1.82721	1.96992	1.02
36	CD200	1.43118	2.03488	1.81521	-2.65
37	HLA-A B C	1.70866	1.58496	1.89416	1.02
38	CD179a	1.70507	1.71335	1.73557	-1.01
39	CD252	2.03425	1.49265	1.587	-1.08
40	CD267	1.67438	1.5377	1.88917	1.18
41	CD210	1.66997	1.66992	1.74827	1.75
42	CD40	1.42277	1.50076	2.13207	-2.11
43	CD131	1.6936	1.73118	1.5759	-1.3
44	CD74	1.95494	1.47145	1.55242	1.09
45	CD164	1.64359	1.49498	1.83694	1.59
46	Notch1	1.63769	1.57667	1.75818	1.13
47	CD317	1.47063	1.59024	1.87587	1.14
48	CD93	1.6007	1.64794	1.66898	-1.02
49	CD85j	1.63543	1.57501	1.68907	1.83
50	CD254	1.42463	1.60337	1.85883	1.04
51	CD273	1.56586	1.70331	1.56337	2.1
52	CD275	1.4858	1.46759	1.84358	-1.24
53	CD47	1.49892	1.53128	1.75939	1.23
54	Jagged 2	1.38118	1.51838	1.88304	1.05
55	CD262	1.54296	1.55839	1.66605	-1.01
56	CD70	1.5166	1.55321	1.67812	-1.57
57	CCR10	1.73426	1.63241	1.3356	1.01
58	CD46	1.29731	1.69978	1.66956	1.11
59	CD124	1.36592	1.61275	1.67784	-4.55
60	CD38	1.41693	1.31583	1.88375	-3.37
61	CD258	1.40264	1.71324	1.49574	1.1
62	CD49f	1.53105	1.63529	1.44408	-1.11
63	CD200R	1.36211	1.33163	1.90184	2.78
64	CD231	1.41444	1.39275	1.77831	1
65	CD18	1.40538	1.46917	1.70867	1.8
66	CD129	2.39738	1.40525	0.76434	-1.05
67	CD220	1.37903	1.51167	1.67078	1.45
68	CD49d	1.42976	1.41958	1.68309	-1.03
69	CD261	1.42386	1.3805	1.72186	-1.46
70	CD59	1.33067	1.53213	1.66331	-1.39
71	CD135	1.29194	1.46393	1.72174	-1.03
72	cd11c	1.67291	1.37185	1.4328	6.91
73	CD1c	1.26679	1.3021	1.90247	-1.47
74	CD126	1.30894	1.51985	1.63288	-1.15
75	HLA-A2	1.38809	1.40037	1.67165	1.1
76	CD156c	1.40105	1.49161	1.54731	1.08
77	CD213a2	1.54903	1.2068	1.68148	1.04
78	Notch2	1.29618	1.43539	1.69792	1.13
79	CD276	1.14399	1.23591	2.03649	1
80	NPC	1.26879	1.52691	1.61552
81	CD22	1.33867	1.54382	1.52187	1.22
82	CD30	1.30452	1.41084	1.64801	-1.02
83	CD195	1.31816	1.37364	1.66997	-1.02
84	CD146	1.32554	1.44291	1.58838	-1.03
85	CD277	1.28461	1.45991	1.60314	1.13
86	CD14	1.44025	1.39821	1.50545	1.04
87	CD85k	1.34707	1.47408	1.52026	1.08
88	CD172g	1.30043	1.44904	1.583	1.01
89	CD178	1.25014	1.38655	1.69209	1.04
90	CD114	1.34933	1.43828	1.52887	-1.11
91	CD115	1.29346	1.39861	1.60878	1.02
92	CD284	1.28707	1.43886	1.57121	-1.56
93	CD1a	1.35455	1.36402	1.56306	-1.69
94	CD102	1.39936	1.33319	1.54385	-1.61
95	CD138	1.20416	1.48876	1.58261	-1.04
96	CD127	1.52541	1.30489	1.43719	-1.29
97	Galectin-9	1.32738	1.39635	1.54128	1.01
98	B2-microglobulin	1.25875	1.31267	1.64788	1.04
99	CD1b	1.75026	1.31086	1.14719	-1.02
100	CD51 CD61	1.33211	1.289	1.55599	1.46
101	CD11b	1.29857	1.29597	1.54582	-2.37
102	CD301	1.23419	1.34228	1.52996	1.01
103	CD205	1.30592	1.32193	1.46526
104	CD85d	1.23158	1.34326	1.51136	3.55
105	cd183	1.22963	1.35323	1.50079	-1.13
106	CD64	1.2507	1.23701	1.59159	1.02
107	FcRL4	1.25903	1.27628	1.54283	1.12
108	CD19	1.1918	1.39076	1.49554	1.76
109	CD152	1.29754	1.29478	1.4803	-1
110	CD325	1.21566	1.27675	1.54362	1.05
111	CD163	1.27005	1.3092	1.4542	-1.06
112	CD119	1.16467	1.24872	1.6184	1.06
113	CD11b	1.13886	1.43101	1.44925	-2.37
114	CD148	1.2418	1.22137	1.53924	-1.43
115	CD314	1.22439	1.22007	1.55704
116	CD55	1.21292	1.33364	1.4443	-1.7
117	CD179b	1.27487	1.31639	1.38936	1.21
118	CD1d	1.17756	1.38659	1.40867	-1.2
119	CD137	1.22442	1.2106	1.53555	1
120	CD215	1.30613	1.26093	1.39348	-1.05
121	Notch4	1.46927	1.5392	0.946774	1.02
122	CD13	1.23745	1.24515	1.46982	-1.01
123	HVEM	1.25617	1.3083	1.3847	1.02
124	CD117	1.19328	1.23917	1.49988	1.04
125	CD66a,2f,c,2f,e	1.11354	1.32139	1.4675	-1.6
126	CD282	1.1842	1.22088	1.48905	-1.2
127	CD257	1.27396	1.36644	1.25277	1.01
128	Lymphotoxin B Receptor	1.17045	1.24403	1.47329	-1.07
129	CD218a	1.27696	1.09381	1.50589	-1.15
130	MAIR-II	1.37847	1.36154	1.12338	1.11
131	CD33	1.31483	0.767912	1.77037	-1.01
132	CD357	1.1963	1.22521	1.42457	-1.15
133	CLEC12A	1.16767	1.27114	1.39509	-1.04
134	CD263	1.1767	1.26814	1.38718	1.01
135	CD73	1.18419	1.29564	1.33444	-2.59
136	DR3	1.0951	1.33347	1.37805	-1.01
137	CD351	1.10206	1.22571	1.46621	1.08
138	HLA-DQ	1.06987	1.12236	1.6011	1
139	IL-28RA	1.18626	1.22082	1.3862	2.2
140	CD253	0.833763	1.36764	1.57773	-2.46
141	CD99	1.17702	1.26226	1.33384	-1.06
142	CD286	0.807355	1.25705	1.6992	1.05
143	MSC	1.09639	1.31958	1.31467	1.12
144	Tim-1	1.17624	1.29442	1.25724	1.04
145	CD355	1.19077	0.840864	1.69545	1.03
146	CD290	1.10819	1.14941	1.46209	1.03
147	CXCR7	1.1366	1.2493	1.3335	1.07
148	CD209	1.08284	1.34665	1.28244	-1.06
149	CD243	1.11776	1.17579	1.41367	-1.46
150	CD162	0.994806	1.21101	1.49431	-1.17
151	CD360	1.1505	1.27862	1.26849	1.13
152	CD23	1.1981	1.14987	1.33154	-4.63
153	cd307e	1.20918	1.2089	1.25961	4.53
154	IFN-g R b chain	1.10684	1.16281	1.36867	-1.41
155	Tim-4	1.1743	1.22345	1.22574	-1.01
156	CD221	1.06232	1.22239	1.33498	-1.26
157	CD354	1.04496	1.04345	1.52215	1.84
158	CD7	1.31458	0.907758	1.37195	1.05
159	CD229	1.01893	0.906106	1.65912	-1.03
160	CD181	1.20332	1.01921	1.31902	-1.03
161	CD85	1.17365	1.11226	1.25254	1.83
162	CD15	1.10118	1.02429	1.40122	-1.12
163	CD10	1.24089	1.23442	0.982024	-1.27
164	CD49e	1.04815	1.10424	1.29429	-1.04
165	FcRL6	0.933133	1.04753	1.45286	1.01
166	CD28	1.08508	1.15307	1.18	1.01
167	CD167a	0.931795	1.1617	1.30884	-1.25
168	CD51	0.854387	1.08223	1.45679	1.46
169	CD56	0.912199	1.09564	1.30963	1.1
170	CD27	1.04049	1.1226	1.15375	-4.33
171	CD26	1.00452	0.983033	1.32053	1.37
172	Delta Opioid Receptor	1.59404	1.10401	0.58012	1.05
173	C3aR	0.95769	1.0227	1.29186	-1.05
174	HLA-G	1.02849	1.11038	1.11753	1.05
175	Siglec-9	1.09933	1.06258	1.0719	-1
176	CD255	1.01185	1.0097	1.21093	1.06
177	HLA-DR	0.90182	0.965111	1.36302	1.07
178	CD193	0.98994	1.16862	1.07033	-1.03
179	CD180	0.941541	1.19314	1.08253	1.15
180	Siglec-10	1.29082	0.330385	1.58062	1.27
181	Pre-BCR	0.949539	0.954596	1.28767	-1.02
182	Notch3	0.866498	1.12094	1.19956	1.01
183	TNAP	0.937321	1.0082	1.20909	-1.03
184	CD90	0.88544	0.975995	1.24844	1.12
185	EGFR	0.949391	0.912772	1.24576	1.02
186	CD2	0.956591	1.0066	1.13799	-1.03
187	CD272	0.971073	0.73262	1.38282	-1.38
188	TSLPR	0.776187	1.05733	1.24533	1
189	CD3	0.910838	0.944971	1.21796	-1.1
190	CD122	0.825477	0.830185	1.40533	2.25
191	CD154	0.901097	0.9577	1.14026	1.17
192	CD338	0.79272	1.04014	1.15899	1.01
193	CX3CR1	0.801698	0.883394	1.23995	-1.04
194	CD45RO	0.81857	0.809972	1.26663	1.16
195	CD50	0.918119	1.02634	0.937944	-1.12
196	CD45RA	1.01159	0.871779	0.985746	1.16
197	CD81	0.777345	0.976541	1.00331	-1.07
198	CLEC9A	0.82677	0.902445	1.0179	1.01
199	CD352	0.692114	0.805177	1.17226	1.4
200	TLT-2	0.756549	1.07626	0.767995	-1.56
201	MSC NPC	0.707784	0.751195	0.912972
202	CD123	0.439901	0.974534	0.957363	-1.76
203	CD45	0.906869	0.844962	0.457936	1.16
204	CD45RB	0.727865	0.319784	1.15157	1.16
205	CD103	0.812157	0.680197	0.642761	1
206	CD31	0.508287	0.622244	0.978305
207	CD21	0.933669	0.633156	0.510168	-8.09
208	CD328	0.438191	0.305554	1.3203	1.01
209	CD34	0.816631	0.842894	0.392423	1.05
210	FceRIa	0.0406414	1.12527	0.671138	-1.47
211	CD6	0.711202	0.696435	0.397909	-1.08
212	Integrin B7	0.363163	0.49155	0.695386	1.55
213	CD9	-0.0171601	0.117352	1.28737	-1.33
214	CD5	0.380143	0.606877	0.377655	-1.46
215	CD304	0.924918	0.380624	-0.00649663	1.02
216	Mac-2	0.495258	0.288621	0.167996	-1.25
217	erbB3	0.652939	0.202517	0.0928366	1.03
218	CD79b	0.261318	0.352912	0.121812	-1.41
219	IgD	0.410705	0.211952	-0.475467	-1.42
220	CD32	-0.15335	-0.582562	0.77637	1.39
221	CD197	-0.0169484	0.116989	-0.112475	-4.74
222	CD196	0.258631	0.0969014	-0.436861	-1.84
223	CD53	0.130563	-0.115971	-0.291783	-1.13
224	DLL1	-0.247061	-0.329807	0.180572	1.21
225	CD35	0.180316	0.33826	-1.05026	-13.09
226	DLL4	-0.616282	0.0852071	-0.0769421	1.04
227	CD24	0.446407	0.209413	-1.41258	-6.44
228	CD268	-0.136907	-0.391019	-0.722196	-1.17
229	Ig light chain l	-0.375216	-0.266354	-0.733795
230	IgM	-0.531988	-0.357132	-0.913743	-1.24
231	CD61	-0.250552	-0.433271	-1.16446	1.81
232	CD62L	-0.900718	-0.334827	-0.744879	-6.95
233	CD20	-0.734894	-0.424405	-1.16598	1.31
234	CD52	-1.50385	-0.657454	-0.792205	-1.1
235	Ig light chain k	-0.808723	-0.922711	-2.26926
236	CD184	-1.3255	-0.765334	-2.10162	-1.84
